# Supplementary material
Source: MDPI journal article supplement (https://www.mdpi.com/2227-9717/10/8/1537)
Supplement: s1 [file s1]

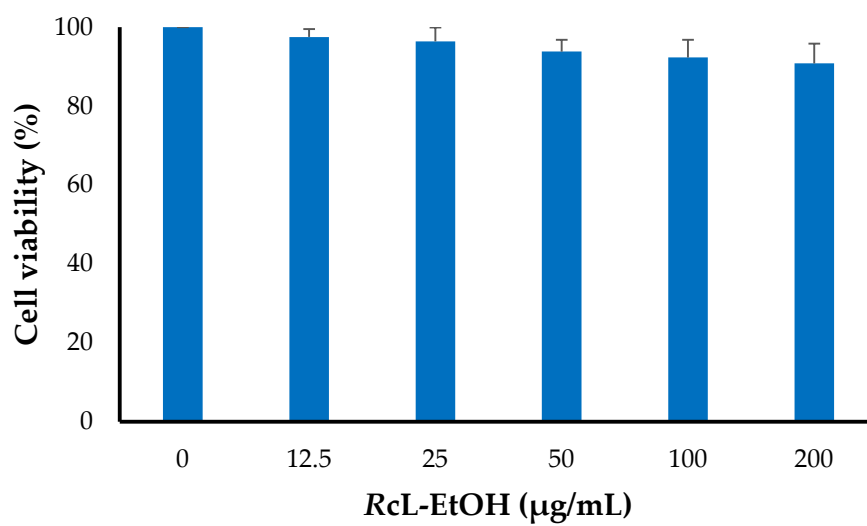

**Figure S1.** The cytotoxic potential of RcL-EtOH against A549 upon pretreatment with ROS inhibitor; N-acetyl-L-cysteine (NAC). Data represent mean  $\pm$  SD. (n = 3).
